# Supplementary material for: A novel viewpoint of an imidazole derivative ionic liquid as an additive for cobalt and nickel electrodeposition
Source: Royal Society of Chemistry journal article supplement (doi:10.1039/d0ra06510b), 2020-01-01
Supplement: d0ra06510b1.pdf [file d0ra06510b1.pdf]

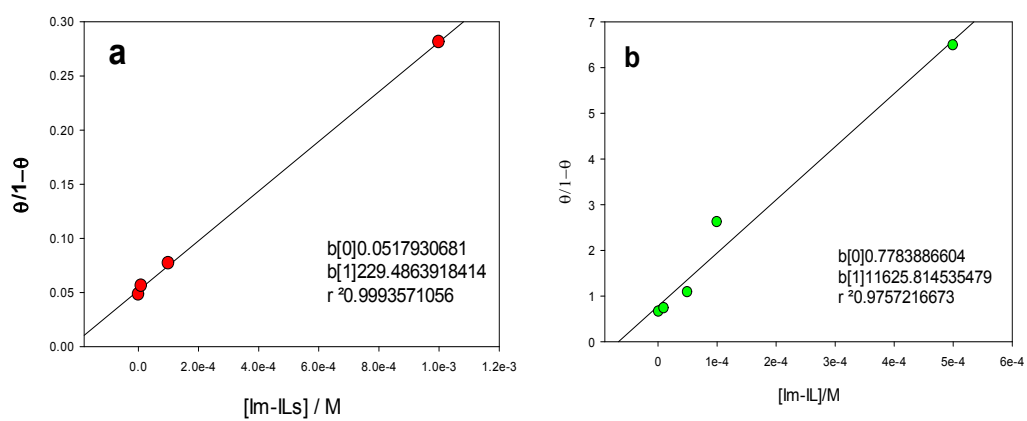

**S1.** Plot of  $\theta/(1-\theta)$  vs concentration of Im-IL: (a) Co (b) Ni electrodeposition.

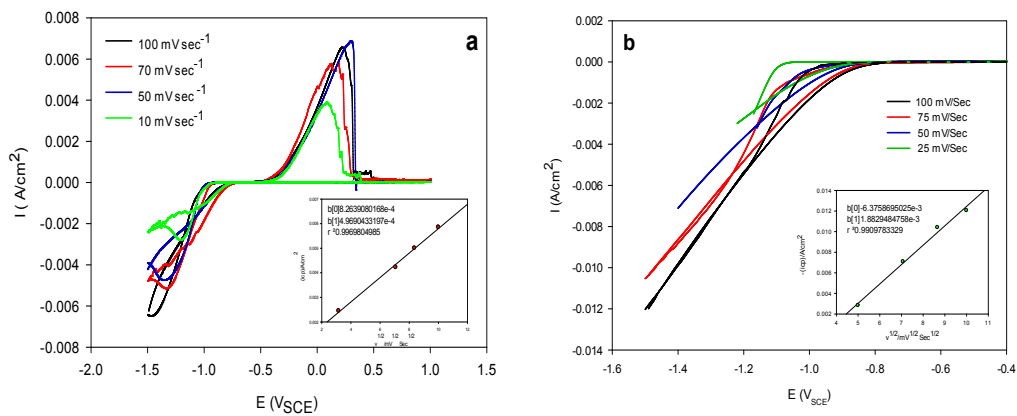

**S2.** CVs for (a) Co and (b) Ni electrodeposition at  $1 \times 10^{-5}$  M Im-IL recorded at GCE with different scan rates. Insert linear relation between cathodic peak current density ( $i_{cp}$ ) as a function of the scan potential rate  $v^{1/2}$ .

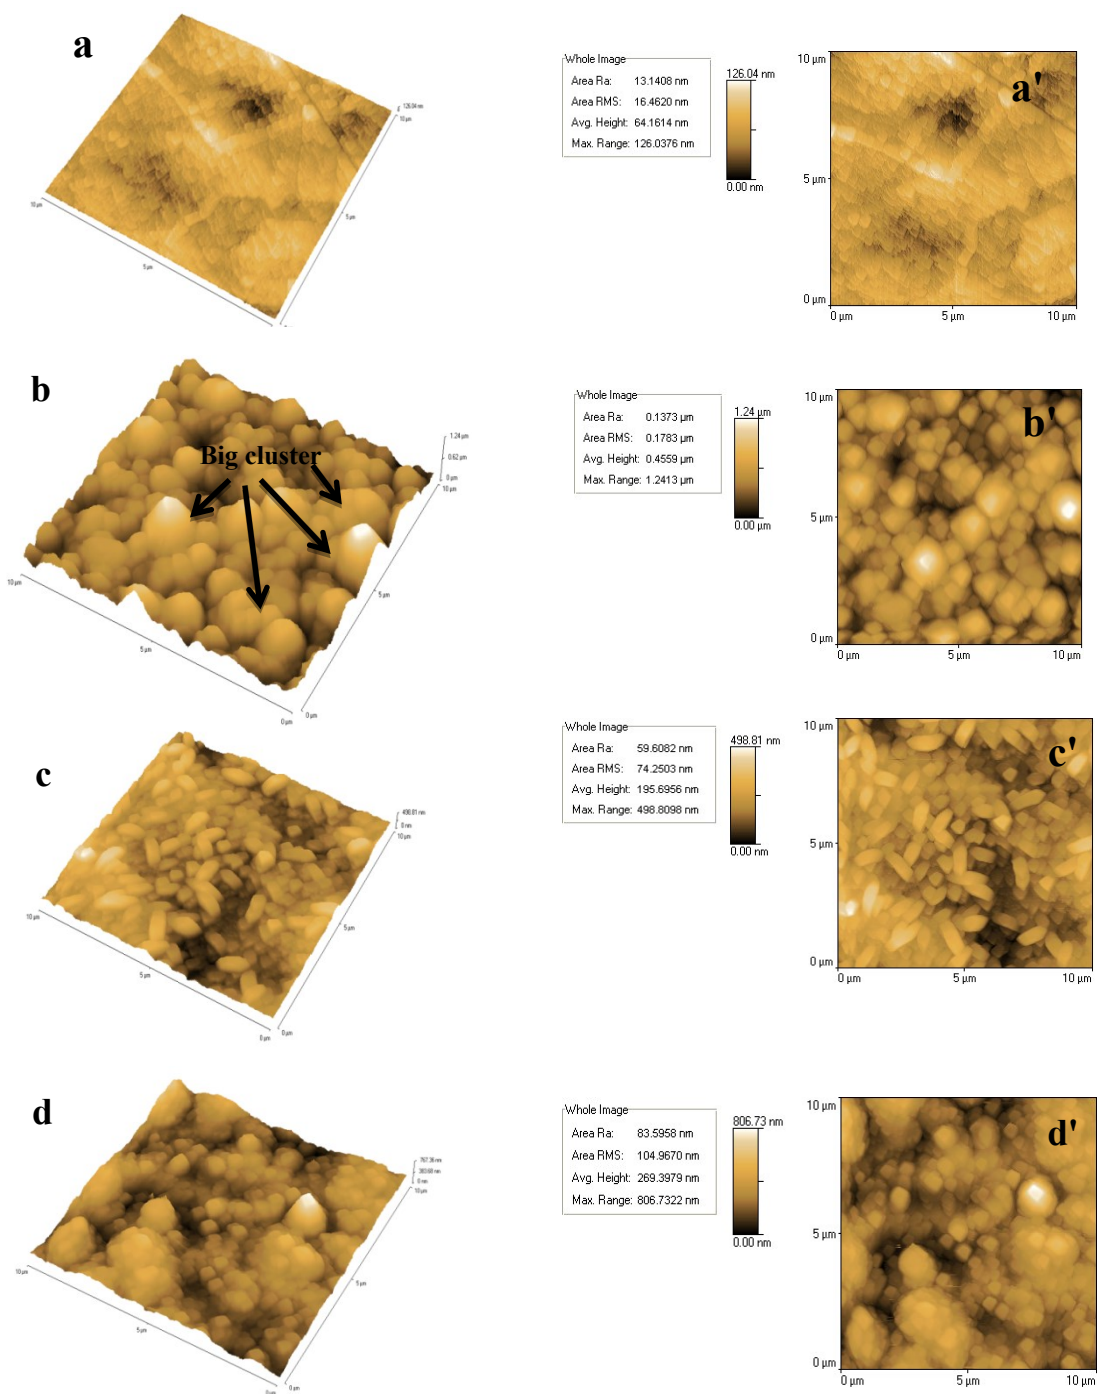

**S3.** AFM 3D, 2D images, of (a, a') pure copper (substrate), Co deposited from bath (b, b') free-Im-IL, (c, c')  $1 \times 10^{-5}$  M Im-IL, (d, d')  $1 \times 10^{-3}$  M Im-IL.

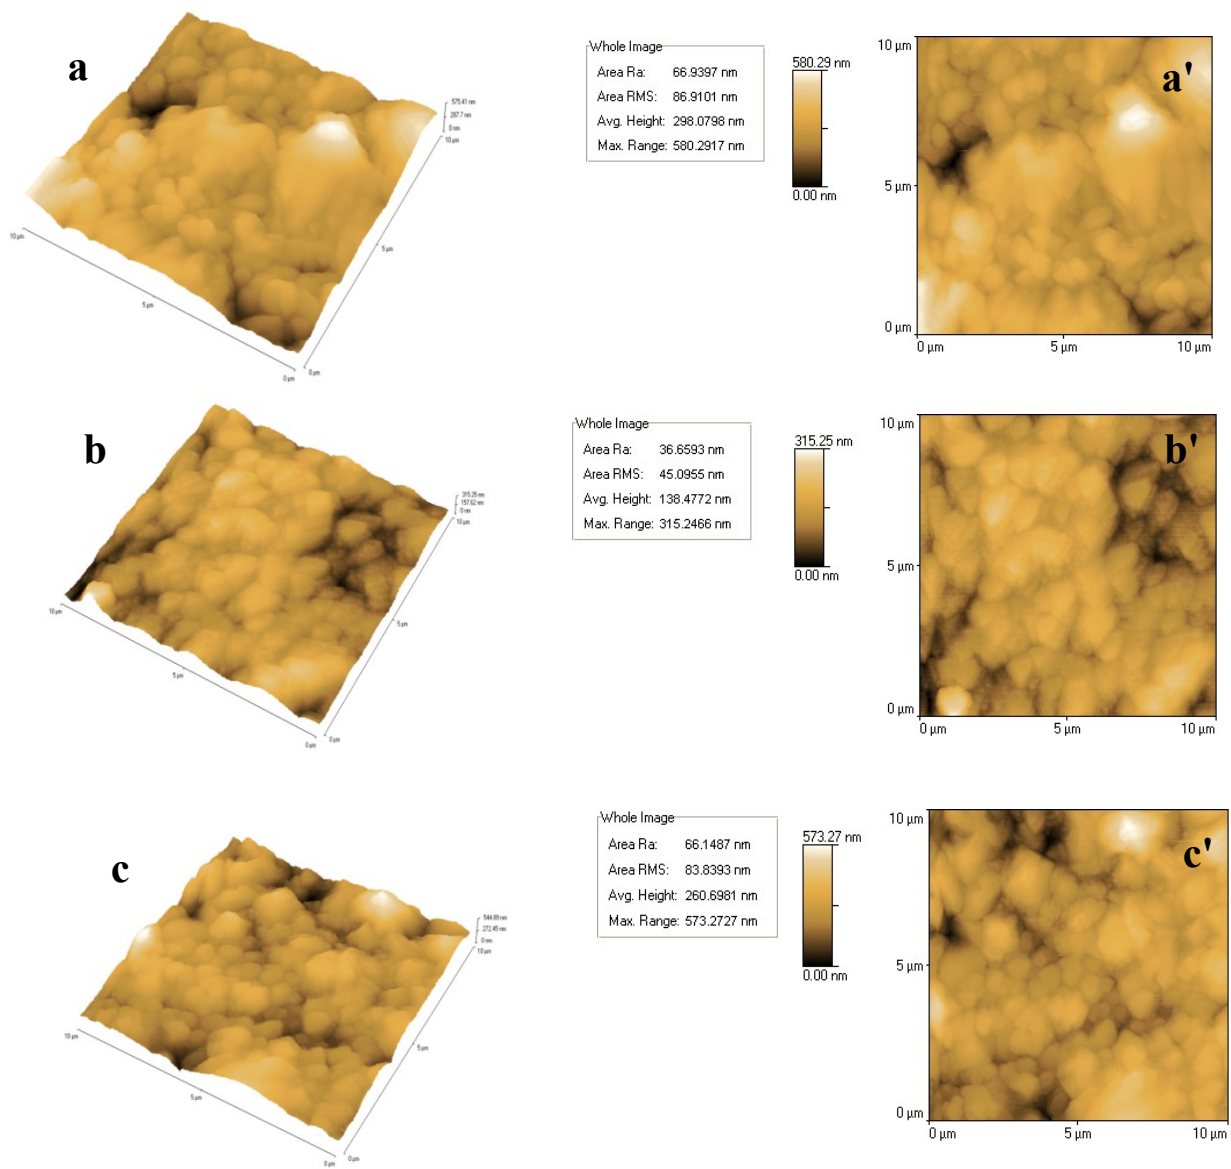

**S4.** AFM 3D, 2D images, of Ni deposited from bath (a, a') free-Im-IL, (b, b')  $1 \times 10^{-4}$  M Im-IL ,(c, c')  $5 \times 10^{-6}$  M Im-IL.

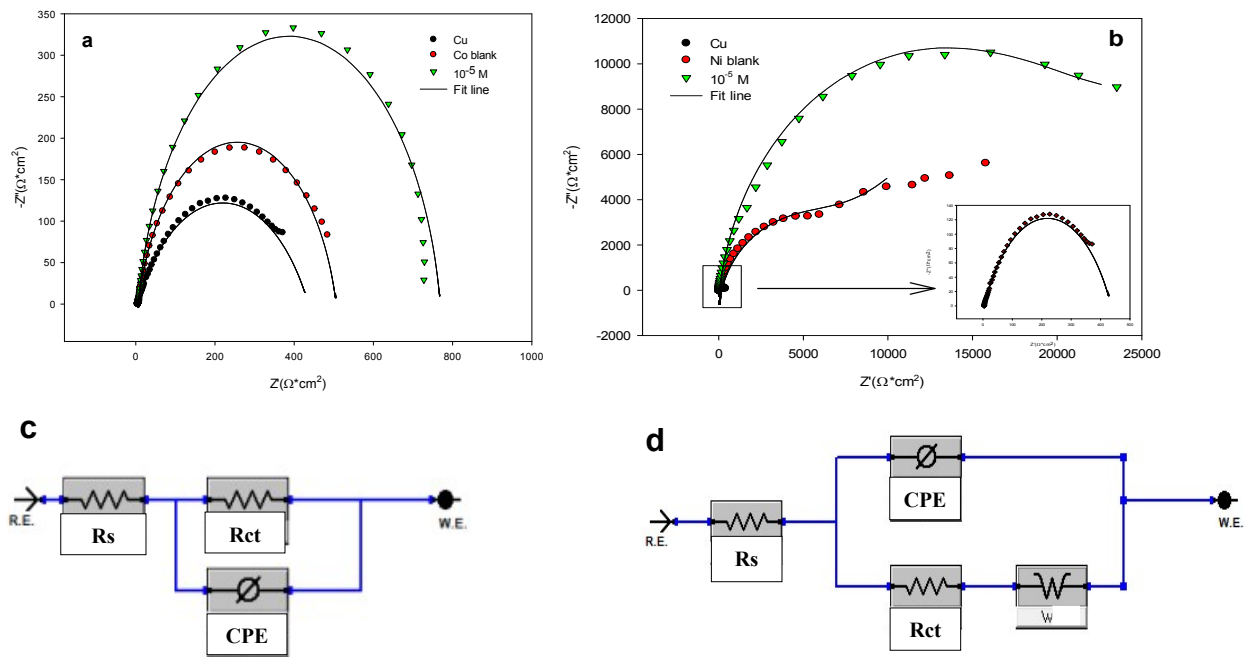

**S5.** Nyquist plots for Cu substrate (a) Co and (b) Ni deposits in 3.5% NaCl in the absence and presence of  $1 \times 10^{-5}$  M Im-IL. Equivalent circuit compatible with the experimental impedance data (c) Co, (d) Ni deposits.

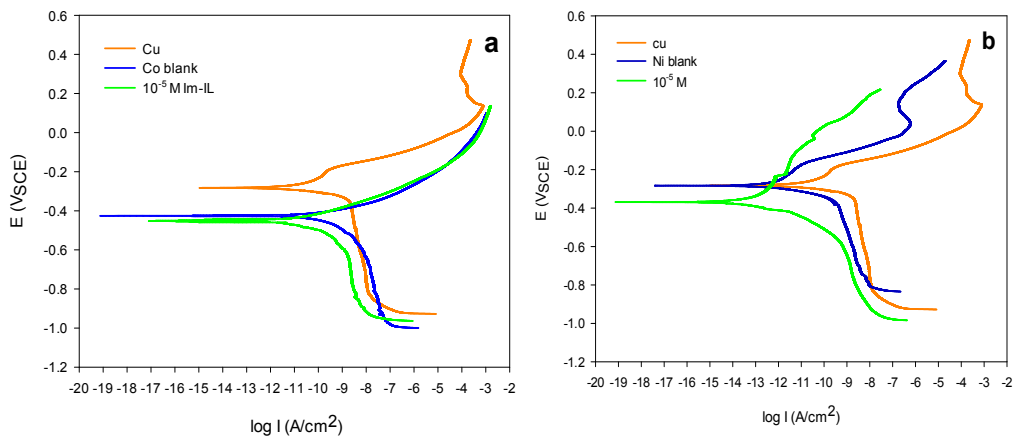

**S6.** Potentiodynamic polarization curves for Co and Ni deposits in the absence and presence of  $1 \times 10^{-5}$  M Im-IL in 3.5% NaCl.

**T1** CPP of Co and Ni electrodeposition at  $2.0 \times 10^{-3}$  mA.cm<sup>-2</sup> in the absence and presence of different concentrations of Im-IL and  $\theta$  by Im-IL at different concentrations.

| [Im-IL]<br>(M)       | (CPP) Co<br>$V_{SCE}$ | $\theta$ (Co) | (CPP) Ni<br>$V_{SCE}$ | $\theta$ (Ni) |
|----------------------|-----------------------|---------------|-----------------------|---------------|
| 0.0                  | -0.82                 | -             | -0.97                 | -             |
| $1.0 \times 10^{-6}$ | -0.84                 | 0.0481        | -1.00                 | 0.396         |
| $1.0 \times 10^{-5}$ | -0.85                 | 0.0531        | -1.01                 | 0.423         |
| $5.0 \times 10^{-5}$ | -                     | -             | -1.04                 | 0.520         |
| $1.0 \times 10^{-4}$ | -0.88                 | 0.0714        | -1.24                 | 0.724         |
| $5.0 \times 10^{-4}$ | -                     | -             | -1.45                 | 0.866         |
| $1.0 \times 10^{-3}$ | -0.92                 | 0.219         | -                     | -             |

**T2** NOP and the height of anodic current ( $i_a$ ) peaks of ALSVs for Co and Ni electrodeposition in the absence and presence of different concentrations of Im-IL.

| [Im-IL]/ M         | NOP / mV (Co) | Height of $i_a$ peak (Acm <sup>-2</sup> ) | NOP / mV (Ni) | Height of $i_a$ peak (Acm <sup>-2</sup> ) |
|--------------------|---------------|-------------------------------------------|---------------|-------------------------------------------|
| 0                  | 0.29          | $4.57 \times 10^{-2}$                     | 0.52          | $4.17 \times 10^{-4}$                     |
| $1 \times 10^{-6}$ | 0.32          | $3.84 \times 10^{-2}$                     | 0.59          | $4.06 \times 10^{-4}$                     |
| $1 \times 10^{-5}$ | 0.39          | $2.58 \times 10^{-2}$                     | 0.62          | $3.40 \times 10^{-4}$                     |
| $5 \times 10^{-5}$ | -             | -                                         | 0.66          | $1.66 \times 10^{-4}$                     |
| $1 \times 10^{-4}$ | 0.4           | $1.08 \times 10^{-2}$                     | 0.60          | $9.65 \times 10^{-5}$                     |
| $5 \times 10^{-4}$ | 0.5           | -                                         | 0.70          | $2.52 \times 10^{-6}$                     |
| $1 \times 10^{-3}$ | 0.6           | $5.34 \times 10^{-2}$                     | -             | -                                         |



**T3** CCE%, Co and Ni deposits appearance under optimal bath conditions in absence and presence of different concentrations of Im-IL.

| [Im-IL]<br>(M)     | CCE% |      | Deposition Appearance         |                                         |
|--------------------|------|------|-------------------------------|-----------------------------------------|
|                    | (Co) | (Ni) | (Co)                          | (Ni)                                    |
| 0                  | 99   | 99   | Pale, hollow gray             | Bright silver                           |
| $5 \times 10^{-7}$ | 98   | 97   | Pale gray                     | Bright silver with little tiny pits     |
| $1 \times 10^{-6}$ | 99   | 97   | Pale gray                     | Bright silver with little tiny pits     |
| $5 \times 10^{-6}$ | -    | 98   | Pale gray                     | Bright silver with many small pits      |
| $1 \times 10^{-5}$ | 99.8 | 99   | Bright gray                   | Bright silver with many small pits      |
| $5 \times 10^{-5}$ | -    | 99.6 | -                             | Very bright silver with very small pits |
| $1 \times 10^{-4}$ | 99.5 | 99.8 | Bright gray with little crack | Very bright silver with no pits         |
| $5 \times 10^{-4}$ | -    | 103  | -                             | Very bright silver with no pits         |
| $1 \times 10^{-3}$ | 104  | -    | Bright gray with more crack   | -                                       |

**T4** The results from impedance and polarization measurements in 3.5% NaCl and average microhardness for the both Co and Ni deposits with and without Im-IL at 25°C.

|                           | $R_{ct}$<br>( $k\Omega \cdot cm^2$ ) | CPE<br>( $k\Omega^{-1} S^n cm^{-2}$ ) | IE%  | W<br>( $k\Omega^{-1} S^{0.5} cm^{-2}$ ) | $i_{corr}$<br>( $\mu A cm^{-2}$ ) | $-E_{corr}$<br>( $mV_{SCE}$ )<br>$\times 10^{-1}$ | Average<br>Hardness<br>( $H_{V100}$ ) |
|---------------------------|--------------------------------------|---------------------------------------|------|-----------------------------------------|-----------------------------------|---------------------------------------------------|---------------------------------------|
| Cu                        | 432.4                                | $553.7 \times 10^{-6}$                | -    | -                                       | $2.84 \times 10^{-5}$             | 2.80                                              | -                                     |
| Co<br>blank               | 500.1                                | $318.4 \times 10^{-6}$                | -    | -                                       | $5.51 \times 10^{-6}$             | 4.26                                              | 342.5                                 |
| $1 \times 10^{-5}$<br>(M) | 2184                                 | $1.109 \times 10^{-4}$                | 77.1 | -                                       | $9.71 \times 10^{-7}$             | 4.52                                              | 368.5                                 |
| Ni blank                  | $7.26 \times 10^3$                   | $181.9 \times 10^{-6}$                | -    | $627 \times 10^{-6}$                    | $6.36 \times 10^{-6}$             | 2.83                                              | 211.25                                |
| $1 \times 10^{-5}$<br>(M) | $22.3 \times 10^3$                   | $122.8 \times 10^{-6}$                | 67.5 | $528 \times 10^{-6}$                    | $3.21 \times 10^{-6}$             | 3.69                                              | 270                                   |
